# Supplementary material for: Copper N-heterocyclic carbene (NHC) complexes as carbene transfer reagents
Source: Royal Society of Chemistry journal article supplement (doi:10.1039/c0cc02308f), 2010-01-01
Supplement: c0cc02308f.pdf [file c0cc02308f.pdf]

*Supporting Information for*

**Copper *N*-Heterocyclic Carbene (NHC) Complexes as  
Carbene Transfer Reagents**

**Marc R. L. Furst and Catherine S. J. Cazin\***

*EaStCHEM School of Chemistry, University of St Andrews, St Andrews, KY16 9ST, UK.*

*Fax: (+)44 (0) 1334 463 808*

*E-mail: cc111@st-andrews.ac.uk*

**Contents**

|                                                  |           |
|--------------------------------------------------|-----------|
| <b>1. Generalities</b>                           | <b>S1</b> |
| <b>2. Carbene transfer reactions leading to</b>  | <b>S2</b> |
| [AuCl(IMes)] <b>2a</b>                           | S2        |
| [AuCl(SIMes)] <b>2b</b>                          | S2        |
| [AuCl(IPr)] <b>2c</b>                            | S2        |
| [Pd( $\mu$ -Cl)Cl(IMes)] <sub>2</sub> <b>3a</b>  | S3        |
| [Pd( $\mu$ -Cl)Cl(SIMes)] <sub>2</sub> <b>3b</b> | S3        |
| [Pd( $\mu$ -Cl)Cl(IPr)] <sub>2</sub> <b>3c</b>   | S4        |
| <b>References</b>                                | <b>S4</b> |

**1. Generalities**

All reactions were performed under an inert atmosphere of argon or nitrogen using standard Schlenk line and glovebox techniques. Solvents were dispensed from a solvent purification system. All other reagents were used without further purification. <sup>1</sup>H and <sup>13</sup>C-<sup>1</sup>H Nuclear Magnetic Resonance (NMR) spectra were recorded on a Bruker AVANCE 300 spectrometer using the residual solvent peak as reference (CHCl<sub>3</sub>:  $\delta_{\text{H}}$  = 7.26 ppm,  $\delta_{\text{C}}$  = 77.16 ppm) at 298K. Elemental analyses were performed by the University of St Andrews Analytical Service. All complexes of type **1** -[CuCl(NHC)]- were prepared by reaction of Cu<sub>2</sub>O with the chloride imidazolium salt.<sup>1</sup>

## 2. Carbene transfer reactions leading to

### **[AuCl(*IMes*)] 2a**

A mixture of [AuCl(SMe<sub>2</sub>)] (137.2 mg, 0.47 mmol) and [CuCl(*IMes*)] **1a** (187.9 mg, 0.47 mmol) in dichloromethane (5 mL) was stirred at 40°C for 1 h. The mixture was filtered through celite and the solvent was removed *in vacuo*. Dichloromethane (3 mL) and petroleum ether (10 mL) were added, resulting in the precipitation of an off-white solid. The product was collected by filtration, washed with petroleum ether (3 x 5 mL) and obtained as a colourless solid in 71% yield (178 mg, 0.33 mmol). NMR spectra were compared to published data.<sup>2</sup>

<sup>1</sup>H NMR (CDCl<sub>3</sub>, 300 MHz): δ = 7.10 (s, 2H, H<sup>4</sup> and H<sup>5</sup>), 7.00 (s, 4H, CH mesityl), 2.36 (s, 6H, CH<sub>3</sub>), 2.11 (s, 12H, CH<sub>3</sub>). <sup>13</sup>C-{<sup>1</sup>H} NMR (CDCl<sub>3</sub>, 75 MHz): δ = 173.6 (s, C<sup>2</sup> carbene), 140.05 (s, CH mesityl), 135.0 (s, CH mesityl), 134.9 (s, CH mesityl), 129.8 (s, CH mesityl), 122.4 (s, C<sup>4</sup>H and C<sup>5</sup>H carbene), 21.4 (s, CH<sub>3</sub>), 18.0 (s, CH<sub>3</sub>). **Elem. Anal.**: Calcd for C<sub>21</sub>H<sub>24</sub>ClN<sub>2</sub>Au: C, 46.98; H, 4.51; N, 5.22. Found: C, 47.09; H, 4.33; N, 5.03.

### **[AuCl(*SIMes*)] 2b**

A mixture of [AuCl(SMe<sub>2</sub>)] (136.7 mg, 0.46 mmol) and [CuCl(*SIMes*)] **1b** (188.1 mg, 0.46 mmol) in dichloromethane (5 mL) was stirred at 40°C for 1 h. The mixture was filtered through celite and the solvent was removed *in vacuo*. Dichloromethane (3 mL) and petroleum ether (10 mL) were added, resulting in the precipitation of an off-white solid. The product was collected by filtration, washed with petroleum ether (3 x 5 mL) and obtained as a colourless solid in 90% yield (225 mg, 0.42 mmol). NMR spectra were compared to published data.<sup>2</sup>

<sup>1</sup>H NMR (CDCl<sub>3</sub>, 300 MHz): δ = 6.95 (s, 4H, CH mesityl), 3.99 (s, 4H, H<sup>4</sup> and H<sup>5</sup>), 2.32 (s, 12H, CH<sub>3</sub>), 2.30 (s, 6H, CH<sub>3</sub>). <sup>13</sup>C-{<sup>1</sup>H} NMR (CDCl<sub>3</sub>, 75 MHz): δ = 195.4 (s, carbene C<sup>2</sup>), 139.2 (s, CH mesityl), 135.8 (s, CH mesityl), 134.85 (s, CH mesityl), 130.1 (s, CH mesityl), 51.0 (s, C<sup>4</sup>H and C<sup>5</sup>H), 21.35 (s, CH<sub>3</sub>), 18.3 (s, CH<sub>3</sub>). **Elem. Anal.**: Calcd for C<sub>21</sub>H<sub>26</sub>ClN<sub>2</sub>Au: C, 46.81; H, 4.86; N, 5.20. Found: C, 46.32; H, 4.77; N, 4.89.

### **[AuCl(*IPr*)] 2c**

A mixture of [AuCl(SMe<sub>2</sub>)] (118.6 mg, 0.40 mmol) and [CuCl(*IPr*)] **1c** (196.3 mg, 0.40 mmol) in dichloromethane (5 mL) was stirred at 40°C for 2 h. The mixture was filtered through celite and the solvent was removed *in vacuo*. Dichloromethane (3 mL) and petroleum ether (10 mL) were added, resulting in the precipitation of an off-white solid. The product was

collected by filtration, washed with petroleum ether (3 x 5 mL) and obtained as a colourless solid in 84% yield (209 mg, 0.34 mmol). NMR spectra were compared to published data.<sup>2</sup>

**<sup>1</sup>H NMR** (CD<sub>2</sub>Cl<sub>2</sub>, 300 MHz):  $\delta$  = 7.57 (t, 2H, CH phenyl), 7.34 (d, 4H, CH phenyl), 7.23 (s, 2H, H<sup>4</sup> and H<sup>5</sup>), 2.57 (pseudo-septuplet, 4H, CH isopropyl), 1.33 (d, 12H, CH<sub>3</sub> isopropyl), 1.23 (d, 12H, CH<sub>3</sub> isopropyl). **<sup>13</sup>C-<sup>1</sup>H NMR** (CD<sub>2</sub>Cl<sub>2</sub>, 75 MHz):  $\delta$  = 146.6 (s, CH phenyl), 131.55 (s, CH phenyl), 125.1 (s, CH phenyl), 124.2 (s, C<sup>4</sup>H and C<sup>5</sup>H), 29.7 (s, CH isopropyl), 25.0 (s, CH<sub>3</sub> isopropyl), 24.60 (s, CH<sub>3</sub> isopropyl). **Elem. Anal.**: Calcd for C<sub>27</sub>H<sub>36</sub>ClN<sub>2</sub>Au: C, 52.22; H, 5.84; N, 4.51. Found: C, 51.76; H, 5.83; N, 4.23.

### **[Pd( $\mu$ -Cl)Cl(IMes)]<sub>2</sub> 3a**

A mixture of [PdCl<sub>2</sub>(NCPh)<sub>2</sub>] (199 mg, 0.52 mmol) and [CuCl(IMes)] **1a** (209.4 mg, 0.52 mmol) in dichloromethane (5 mL) was stirred at 40°C for 1 h. The mixture was filtered through celite and the solvent was removed *in vacuo*. Dichloromethane (3 mL) and petroleum ether (10 mL) were added, resulting in the precipitation of a yellow solid. The product was collected by filtration, washed with petroleum ether (3 x 5 mL) and obtained as a yellow solid in 79% yield (196 mg, 0.20 mmol). NMR spectra were compared to published data.<sup>3</sup>

**<sup>1</sup>H NMR** (CDCl<sub>3</sub>, 300 MHz):  $\delta$  = 7.33 (s, broad, 8H, CH mesityl), 6.95 (s, 4H, H<sup>4</sup> and H<sup>5</sup>), 2.45 (s, 12H, CH<sub>3</sub>), 2.24 (s, 12H, CH<sub>3</sub>), 2.09 (s, 12H, CH<sub>3</sub>). **<sup>13</sup>C-<sup>1</sup>H NMR** (CDCl<sub>3</sub>, 75 MHz):  $\delta$  = 139.5 (s, CH mesityl), 135.9 (s, CH mesityl), 134.75 (s, CH mesityl), 129.7 (s, CH mesityl), 124.8 (s, C<sup>4</sup>H and C<sup>5</sup>H), 21.6 (s, CH<sub>3</sub>), 19.3 (s, CH<sub>3</sub>), 19.0 (s, CH<sub>3</sub>). **Elem. Anal.**: Calcd for C<sub>42</sub>H<sub>48</sub>Cl<sub>4</sub>N<sub>4</sub>Pd<sub>2</sub>: C, 52.36; H, 5.02; N, 5.81. Found: C, 52.67; H, 5.12; N, 5.71.

### **[Pd( $\mu$ -Cl)Cl(SIMes)]<sub>2</sub> 3b**

A mixture of [PdCl<sub>2</sub>(NCPh)<sub>2</sub>] (198.2 mg, 0.52 mmol) and [CuCl(SIMes)] **1b** (209.5 mg, 0.52 mmol) in dichloromethane (5 mL) was stirred at 40°C for 1 h. The mixture was filtered through celite and the solvent was removed *in vacuo*. Dichloromethane (3 mL) and petroleum ether (10 mL) were added, resulting in the precipitation of a yellow solid. The product was collected by filtration, washed with petroleum ether (3 x 5 mL) and obtained as a yellow solid in 82% yield (205 mg, 0.21 mmol). NMR spectra were compared to published data.<sup>3</sup>

**<sup>1</sup>H NMR** (CDCl<sub>3</sub>, 300 MHz):  $\delta$  = 7.00 (s, broad, 8H, CH mesityl), 3.86 (s, broad, 8H, H<sup>4</sup> and H<sup>5</sup>), 2.45 (s, 12H, CH<sub>3</sub>), 2.41 (s, 12H, CH<sub>3</sub>), 2.26 (s, 12H, CH<sub>3</sub>). **<sup>13</sup>C-<sup>1</sup>H NMR** (CDCl<sub>3</sub>, 75 MHz):  $\delta$  = 138.7 (s, CH mesityl), 134.6 (s, CH mesityl), 129.9 (s, CH mesityl), 129.9 (s, CH

mesityl), 51.5 (s, C<sup>4</sup>H and C<sup>5</sup>H), 21.6 (s, CH<sub>3</sub>), 19.4 (s, CH<sub>3</sub>). **Elem. Anal.:** Calcd for C<sub>42</sub>H<sub>52</sub>Cl<sub>4</sub>N<sub>4</sub>Pd<sub>2</sub>: C, 52.14; H, 5.42; N, 5.79. Found: C, 52.12; H, 5.49; N, 5.56.

### **[Pd( $\mu$ -Cl)Cl(IPr)]<sub>2</sub> 3c**

A mixture of [PdCl<sub>2</sub>(NCPh)<sub>2</sub>] (169.4 mg, 0.44 mmol) and [CuCl(IPr)] **1c** (215.4 mg, 0.44 mmol) in dichloromethane (5 mL) was stirred at 40°C for 2 h. The mixture was filtered through celite and the solvent was removed *in vacuo*. Dichloromethane (3 mL) and petroleum ether (10 mL) were added, resulting in the precipitation of a yellow solid. The product was collected by filtration, washed with petroleum ether (3 x 5 mL) and obtained as an ochre yellow solid in 82% yield (206 mg, 0.18 mmol). NMR spectra were compared to published data.<sup>4</sup>

**<sup>1</sup>H NMR** (CDCl<sub>3</sub>, 300 MHz):  $\delta$  = 7.55 (t, 4H, CH phenyl), 7.30 (d, 8H, CH phenyl), 6.99 (s, 4H, H<sup>4</sup> and H<sup>5</sup>), 2.87 (br. s, 2H, CH isopropyl), 2.61 (br. s, 2H, CH isopropyl), 1.31 (d, broad, 24H, CH<sub>3</sub> isopropyl), 0.99 (d, broad, 24H, CH<sub>3</sub> isopropyl). **<sup>13</sup>C-{<sup>1</sup>H} NMR** (CDCl<sub>3</sub>, 75 MHz):  $\delta$  = 148.14 (s, CH phenyl), 146.53 (s, CH phenyl), 134.54 (s, CH phenyl), 130.6 (s, CH phenyl), 125.5 (s, CH phenyl), 124.5 (s, C<sup>4</sup>H and C<sup>5</sup>H), 28.9 (s, CH isopropyl), 26.5 (s, CH<sub>3</sub> isopropyl), 23.5 (s, CH<sub>3</sub> isopropyl). **Elem. Anal.:** Calcd for C<sub>54</sub>H<sub>72</sub>Cl<sub>4</sub>N<sub>4</sub>Pd<sub>2</sub>: C, 57.30; H, 6.41; N, 4.95. Found: C, 57.09; H, 6.41; N, 4.66.

## **References**

- 1 C. A. Citadelle, E. Le Nouy, F. Bisaro, A. M. Z. Slawin, C. S. J. Cazin, *Dalton Trans.* 2010, **39**, 4489-4491.
- 2 P. De Frémont, N. M. Scott, E. D. Stevens and S. P. Nolan, *Organometallics* 2005, **24**, 2411.
- 3 D. R. Jensen and M. S. Sigman, *Org. Lett.*, 2003, **5**, 63.
- 4 M. S. Viciu, R. M. Kissling, E. D. Stevens and S. P. Nolan, *Org. Lett.*, 2002, **4**, 2229.
